# Supplementary material
Source: PubMed Central journal article supplement (PMC4509225)
Supplement: ijcem0008-7388-f5.pdf [file ijcem0008-7388-f5.pdf]

## Snail and EMT in ovarian cancer

**Supplemental Table 1.** The primer used in the real-time PCR

| Gene   | Accession No.  | Primer (5'-3')                                                 |
|--------|----------------|----------------------------------------------------------------|
| CDH1   | NM_004360.3    | For: TGAAGGTGACAGACCTCTGGAT<br>Rev: TGGGTGAATTCGGGCTTGTT       |
| CTNNB1 | NM_001098209.1 | For: TTGAAAATCCAGCGTGGACA<br>Rev: TCGAGTCATTGCATACTGTC         |
| FN1    | NM_002026.2    | For: GGTGACACTTATGAGCGTCCTAAA<br>Rev: AACATGTAACCACAGTCTCATGTG |
| CDH2   | NM_001792.3    | For: TGGGAATCCGACGAATGG<br>Rev: TGCAGATCGGACCGGATACT           |
| GAPDH  | NM_002046      | For: GAAGGTGAAGGTCGGAGTC<br>Rev: GAAGATGGTGATGGGATTTTC         |

CDH1: cadherin 1, E-cadherin; CTNNB1: Catenin beta-1; FN1: Fibronectin; CDH2: N-cadherin GAPDH: glyceraldehyde phosphate dehydrogenase; For: forward; Rev: reverse.

**Supplemental Table 2.** The expression levels of Snail and EMT related molecular markers in different stages in the group of carcinoma tissue

|             | Stage I |      |    | Stage II |       |   | Stage III |      |    | Stage IV |      |    |
|-------------|---------|------|----|----------|-------|---|-----------|------|----|----------|------|----|
|             | Mean    | SD   | n  | Mean     | SD    | n | Mean      | SD   | n  | Mean     | SD   | n  |
| E-cadherin  | 1.33    | 0.21 | 13 | 0.83     | 0.070 | 9 | 0.70      | 0.02 | 26 | -2.10    | 0.15 | 16 |
| β-catenin   | 0.29    | 0.07 |    | -0.04    | 0.032 |   | -3.20     | 0.13 |    | -3.98    | 0.04 |    |
| Fibronectin | -0.90   | 0.04 |    | 1.20     | 0.160 |   | 4.50      | 0.05 |    | 4.90     | 0.24 |    |
| N-cadherin  | 1.37    | 0.21 |    | 1.28     | 0.580 |   | 5.70      | 0.16 |    | 5.99     | 0.18 |    |
| Snail       | 2.20    | 0.81 |    | 3.50     | 0.070 |   | 5.83      | 0.09 |    | 7.22     | 0.06 |    |
